# Supplementary material
Source: PubMed Central journal article supplement (PMC2851927)
Supplement: 1000121107_pnas.201000121SI.pdf [file 1000121107_pnas.201000121SI.pdf]

# Supporting Information

Zentner and Eerola 10.1073/pnas.1000121107

## SI Text

### Infants' Rhythmic Engagement and Their Previous Exposure to Music.

To examine the influence of prior musical experience on infants' experimental behavior, we purposefully recruited two groups of infants in experiment 2. One group received at least 4 months of music education ( $N = 35$ ), whereas the other group did not ( $N = 34$ ). Precocious music education is popular in Finland. It typically involves musical interactions between caretaker and infant, in which rocking, bouncing, and clapping hands with the music play a prominent role (1). To examine whether music education enhances infants' dancing capabilities, we conducted two analyses.

First, we computed the interaction between music education and contrast or L-scores, which define the degree to which any

individual infant bore out the prediction. The interaction was nonsignificant,  $t(67) = 0.37$ ,  $P =$  not significant. Second, infants with music education had larger synchronization errors (see main text) compared with infants without music education [177 vs. 134 ms,  $t(50) = 3.92$ ,  $P < 0.001$ ,  $\eta^2 = 0.29$ ]. The results were similar when we correlated the duration of early childhood music education with rhythmic engagement and coordination with music in experiment 2. Parents also filled out a questionnaire that captured the prominence of music listening and making in their home environments. None of the questionnaire variables were significantly related to the infants' rhythmic behaviors in the experiment (e.g., approximate hours of musical exposure per week, the amount of parental musical involvement).

1. Opetushallitus (2002) *National Curriculum in Music Education 2002* (Edita Prima, Helsinki, Finland).

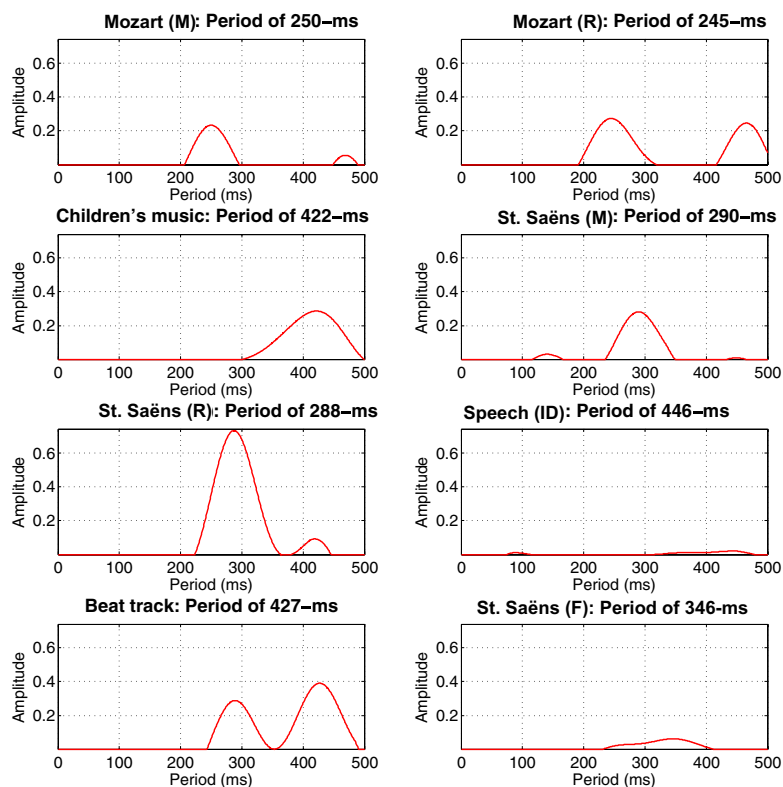

Fig. S1. Periodic structure of the stimuli displaying the main periodicities in milliseconds ( $x$  axis) and the clarity of the periodicity in the amplitude of the curves ( $y$  axis).

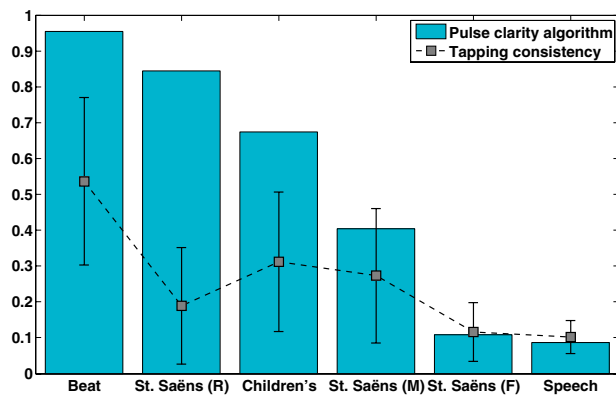

**Fig. S2.** Accessibility of beat in each stimulus in experiment 2 evaluated by normalized tapping consistency (lines) of a sample of 5- to 9-year-old children (means and 95% confidence intervals) and estimation of pulse clarity (bars) by a computational algorithm.

**Table S1.** Duration of infants' rhythmic movements by condition and age (experiment 1)

| Age groups (months) | Mozart (music) | Mozart (rhythm) | Saint-Saëns (music) | Saint-Saëns (rhythm) | Adult-directed speech |
|---------------------|----------------|-----------------|---------------------|----------------------|-----------------------|
| 5–7 ( $n = 14$ )    | 3.43 (1.57)    | 1.14 (0.66)     | 4.11 (1.76)         | 2.71 (1.74)          | 0.64 (0.39)           |
| 9–12 ( $n = 19$ )   | 7.97 (2.38)    | 9.84 (3.23)     | 9.63 (3.77)         | 9.47 (3.41)          | 2.00 (0.96)           |
| 13–16 ( $n = 18$ )  | 9.89 (3.49)    | 9.67 (3.51)     | 9.78 (2.64)         | 12.02 (3.35)         | 2.14 (1.08)           |
| Total ( $n = 51$ )  | 7.40 (1.59)    | 7.39 (1.78)     | 8.17 (1.76)         | 8.52 (1.84)          | 1.68 (0.53)           |

Values are mean durations (s). SEs in parentheses.

**Table S2.** Duration of infants' rhythmic movements by condition and age (experiment 2)

| Age groups (months) | Children's Music | Saint-Saëns (music) | Saint-Saëns (rhythm) | Infant-directed speech | Isochronous drumbeats | Saint-Saëns (fluctuating) |
|---------------------|------------------|---------------------|----------------------|------------------------|-----------------------|---------------------------|
| 5–7 ( $n = 13$ )    | 7.47 (3.13)      | 6.54 (4.37)         | 5.64 (3.08)          | 5.44 (4.96)            | 6.52 (2.62)           | 10.63 (5.59)              |
| 9–12 ( $n = 20$ )   | 5.18 (2.11)      | 6.31 (2.73)         | 6.36 (2.15)          | 1.44 (0.59)            | 5.19 (1.80)           | 6.50 (2.61)               |
| 13–16 ( $n = 22$ )  | 6.13 (2.49)      | 8.05 (3.55)         | 4.29 (3.29)          | 0.60 (0.41)            | 6.51 (3.33)           | 6.85 (2.06)               |
| 18–24 ( $n = 14$ )  | 8.56 (4.42)      | 5.65 (3.49)         | 6.86 (3.58)          | 1.20 (0.91)            | 2.50 (1.88)           | 3.89 (2.43)               |
| Total ( $n = 69$ )  | 6.60 (1.44)      | 6.77 (1.72)         | 5.66 (1.51)          | 1.87 (0.97)            | 5.32 (1.32)           | 6.86 (1.52)               |

Values are mean durations (s). SEs in parentheses.

**Audio S1.** Mozart (Music condition) from experiment 1 (excerpt). Mozart, Wolfgang Amadeus. *Eine kleine Nachtmusik*. Last movement. Recording (CD): Academy of St. Martin in the Fields. Neville Marriner, conductor. EMI Recordings (1997).

[Audio S1](#)

**Audio S2.** Mozart (Rhythm condition) from experiment 1 (excerpt). Created from Audio S1 by replicating the music with only percussive instruments.

[Audio S2](#)

**Audio S3.** Saint-Saëns (Music condition) from experiments 1 and 2 (excerpt). Saint-Saens, Camille. *Carnival of Animals*. Finale. Recording (CD): Alain Ridout et Frieder Meschwitz. Martha Argerich and Nelson Freire, piano. Philipps (1988).

[Audio S3](#)

**Audio S4.** Saint-Saëns (Rhythm condition) from experiments 1 and 2 (excerpt). Created from Audio S3 by replicating the music with only percussive instruments.

[Audio S4](#)

**Audio S5.** Speech 1 from experiment 1 (excerpt). Children's story narrated in French (male and female voice).

[Audio S5](#)

**Audio S6.** Speech 2 from experiment 2 (excerpt). Infant-directed speech in English (female voice).

[Audio S6](#)

**Audio S7.** Children's song music from experiment 2 (excerpt). Source: Kissaminttupolka. Recording (CD): Mukaralla, Humppeli Romppeli CD, FinalMix Oy (1997).

[Audio S7](#)

**Audio S8.** Isochronous drumbeat (beat 1) from experiment 2 (excerpt). 4/4 m pattern with 285-ms interonset intervals.

[Audio S8](#)

**Audio S9.** Isochronous drumbeats (beat 2) from experiment 2 (excerpt). 4/4 m pattern with 428-ms interonset intervals.

[Audio S9](#)

**Audio S10.** Fluctuating rhythmic stimulus from experiment 2 (excerpt). The original recording of Audio S3 modified with random tempo fluctuations.

[Audio S10](#)

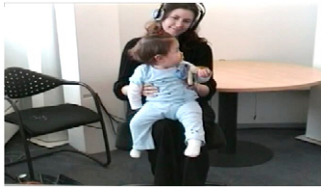

**Movie S1.** A 25-s excerpt from experiment 1. Mozart rhythm, age 12 months.

[Movie S1](#)

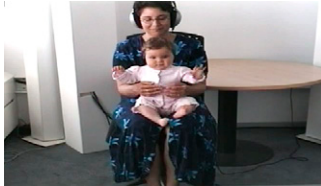

**Movie S2.** A 15-s excerpt from experiment 1. Mozart music, age 9 months.

[Movie S2](#)

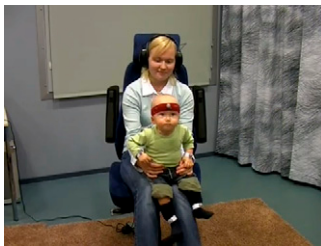

**Movie S3.** A 50-s excerpt from experiment 2. Saint-Saëns, age 10 months.

[Movie S3](#)

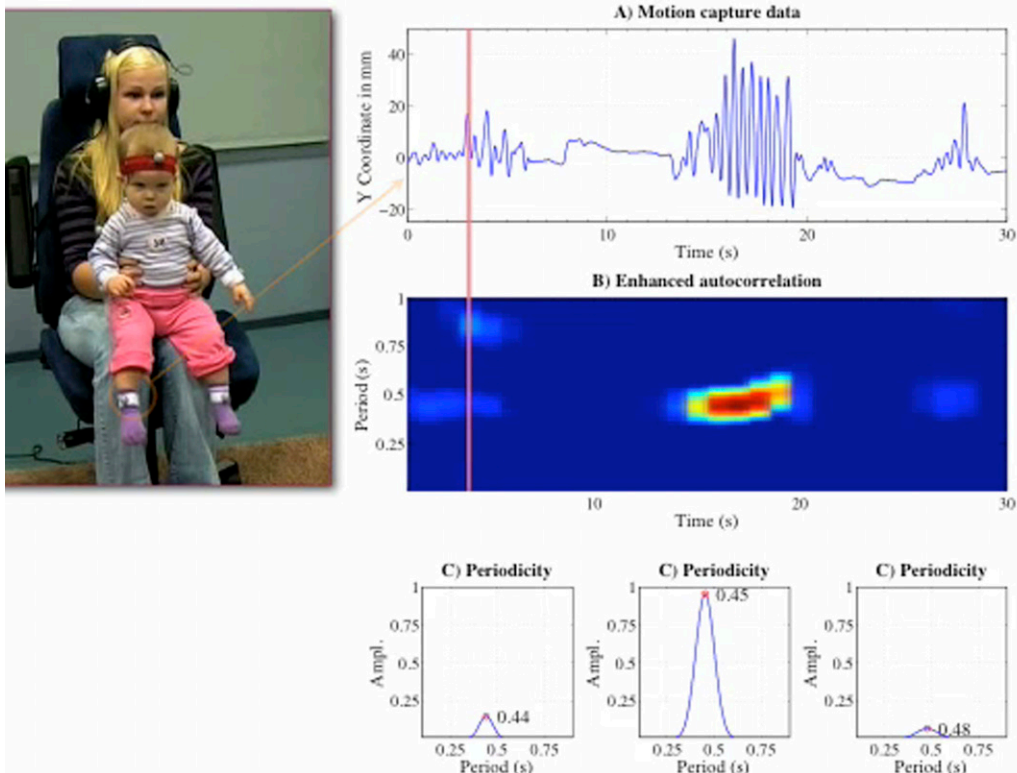

Movie S4. A 35-s excerpt from experiment 1. Beat track, age 14 months, with an illustration of the motion-capture data.

[Movie S4](#)
